# Supplementary material for: Kidney Function Following Left Ventricular Assist Device Implantation: An Observational Cohort Study
Source: PubMed Central journal article supplement — Kidney Med. 2021 Apr 2;3(3):378–385.e1. doi: 10.1016/j.xkme.2021.01.009 (PMC8178473; doi:10.1016/j.xkme.2021.01.009), 2021-04-02
Supplement: mmc1.pdf [file mmc1.pdf]

**Table S1 – Timeline of Participant Censorship during Follow-up**

|                                    | Time from LVAD implantation |                        |                         |                          |           |
|------------------------------------|-----------------------------|------------------------|-------------------------|--------------------------|-----------|
| Time from LVAD                     | Baseline to<br>1 month      | 1 month to<br>3 months | 3 months to<br>6 months | 6 months to<br>12 months | 12 months |
| Participants for analysis          | n=145                       | n=131                  | n=127                   | n=106                    | n=66      |
| Transplanted                       | 0                           | 4                      | 11                      | 22                       |           |
| Dead                               | 6                           | 0                      | 3                       | 3                        |           |
| Dialysis                           | 6                           | 0                      | 1                       | 0                        |           |
| Missing serum creatinine           | 1                           | 0                      | 2                       | 0                        |           |
| Transferred care/Lost to follow-up | 1                           | 0                      | 4                       | 15                       |           |

**Table S2 –Association of variables that were found not to be statistically significantly associated with change in eGFR at 1 month in univariate analysis**

| Variable                                      | n   | $\beta$ Coefficient | 95% CI          |
|-----------------------------------------------|-----|---------------------|-----------------|
| Baseline Weight                               | 131 | -2.02               | -5.73 to 1.68   |
| BMI                                           | 131 | -2.04               | -5.74 to 1.67   |
| BTT vs. DT                                    | 131 | 3.18                | -1.83 to 8.18   |
| Ischemic Cardiomyopathy                       | 131 | -1.14               | -8.55 to 6.27   |
| Smoking                                       | 131 | -4.64               | -12.22 to 2.94  |
| Atrial Fibrillation                           | 131 | -3.59               | -11.08 to 3.90  |
| Chronic Kidney Disease                        | 88  | 2.49                | -7.26 to 12.24  |
| COPD                                          | 130 | -7.67               | -16.87 to 1.54  |
| Peripheral Arterial Disease                   | 115 | -3.02               | -16.77 to 10.73 |
| Stroke                                        | 113 | -6.67               | -18.67 to 5.33  |
| Prior Cardiac Surgery                         | 115 | 3.21                | -5.44 to 11.85  |
| INTERMACS Status 1-3 vs. 4-7                  | 131 | 7.94                | -1.06 to 16.94  |
| Home Inotropes vs. Not on Inotropes at Home   | 114 | 2.46                | -2.00 to 6.92   |
| MCS prior to LVAD vs. no MCS                  | 113 | 4.20                | -5.47 to 13.87  |
| ACEi/ARB use prior to LVAD                    | 115 | -1.03               | -9.26 to 7.20   |
| Beta-blocker use prior to LVAD                | 115 | -1.42               | -9.68 to 6.84   |
| Mineral receptor antagonist use prior to LVAD | 115 | 0.34                | -7.76 to 8.44   |
| Cardiac resynchronization therapy             | 114 | -0.98               | -10.54 to 8.58  |
| Implantable cardiac defibrillator             | 126 | -6.45               | -18.89 to 5.99  |
| Creatinine (admission)                        | 131 | 0.51                | -3.21 to 4.23   |
| eGFR (admission)                              | 131 | -0.06               | -3.78 to 3.66   |
| Sodium                                        | 131 | -1.72               | -5.42 to 1.99   |
| Bicarbonate                                   | 131 | 0.53                | -3.19 to 4.23   |
| Log NTproBNP                                  | 111 | 1.41                | -2.55 to 5.37   |
| Hemoglobin                                    | 131 | -2.81               | -6.50 to 0.88   |
| Hemoglobin A1c                                | 113 | 0.44                | -3.66 to 4.53   |

Wettersten et al, *Kidney Medicine*, "Kidney Function Following Left Ventricular Assist Device Implantation: An Observational Cohort Study"

|                              |     |       |                |
|------------------------------|-----|-------|----------------|
| Log AST                      | 116 | 2.50  | -1.54 to 6.54  |
| 24-hour urine creatinine     | 63  | 0.60  | -4.56 to 5.76  |
| Log creatinine clearance     | 60  | -1.09 | -6.46 to 4.29  |
| Urine blood (any vs. none)   | 66  | -5.66 | -18.30 to 6.97 |
| Log urine protein/creatinine | 116 | -1.68 | -5.57 to 2.20  |
| Ejection Fraction            | 130 | 1.55  | -2.18 to 5.27  |
| CVP                          | 119 | 2.59  | -1.31 to 6.48  |
| Wedge pressure               | 116 | 1.09  | -2.77 to 4.95  |
| Cardiac Index                | 112 | -0.33 | -4.31 to 3.66  |
| PVR                          | 89  | -1.91 | -6.44 to 2.62  |
| CVP/Wedge                    | 115 | 1.72  | -2.16 to 5.60  |
| PAPi                         | 118 | -2.86 | -6.73 to 1.01  |

ACEi = angiotensin converting enzyme inhibitor; ARB = angiotensin receptor blocker; BMI = body mass index; BTT = bridge to transplant; COPD = chronic obstructive pulmonary disease; CVP = central venous pressure; DT = destination therapy; eGFR = estimated glomerular filtration rate; LVAD = left ventricular assist device; MCS = mechanical circulatory support; PAPi = pulmonary artery pressure index; PVR = pulmonary vascular resistance
